# Supplementary material for: Cardiac anomalies and associated comorbidities in a large adolescent population
Source: publisher site journal article supplement (doi:10.1515/ijamh-2017-0020), 2017-06-14
Supplement: Supplementary file 3 [file Fink_et_al_-_Table_S2.docx]

| **Table S2. Univariate analysis of clinical characteristics and disease-specific variables.** | | | | | | | | |
| --- | --- | --- | --- | --- | --- | --- | --- | --- |
|  | Valvar | | Significant Valvar | | Non-Valvar | | Significant non-Valvar | |
| Medical condition | n (%1) | p value | n (%1, %2) | p value | n (%1) | p value | n (%1, %3) | p value |
| Total | 1058 (0.93%) |  | 213 (0.19%, 20.1%) |  | 415 (0.37%) |  | 84 (0.07%, 20.2%) |  |
| Spinal deformities | 349 (1.10%) | **<0.0001** | 78 (0.25%, 22.3%) | **0.004** | 142 (0.45%) | **0.004** | 20 (0.06%, 14.1%) | 0.408 |
| Refractive errors | 314 (1.02%) | 0.062 | 52 (0.17%, 16.6%) | 0.370 | 126 (0.41%) | 0.139 | 31 (0.10%, 24.6%) | **0.044** |
| Hypertension type I+II | 303 (1.13%) | **<0.0001** | 52 (0.19%, 17.2%) | 0.774 | 115 (0.43%) | **0.047** | 28 (0.10%, 24.3%) | **0.035** |
| Flat feet | 205 (0.90%) | 0.219 | 56 (0.24%, 27.3%) | 0.058 | 77 (0.34%) | 0.422 | 6 (0.03%, 7.79%) | **0.003** |
| Height_90%tile | 152 (1.67%) | **<0.0001** | 25 (0.27%, 16.4%) | **0.046** | 34 (0.37%) | 0.896 | 9 (0.10%, 26.5%) | 0.363 |
| Height_95%tile | 106 (2.08%) | **<0.0001** | 16 (0.31%, 15.1%) | **0.033** | 26 (0.51%) | 0.080 | 7 (0.14%, 26.9%) | 0.089 |
| Height_10%tile | 71 (0.70%) | **0.010** | 24 (0.24%, 33.8%) | 0.242 | 39 (0.38%) | 0.765 | 10 (0.10%, 25.6%) | 0.348 |
| Height_5%tile | 59 (0.78%) | 0.170 | 20 (0.27%, 33.9%) | 0.104 | 23 (0.31%) | 0.376 | 6 (0.08%, 26.1%) | 0.847 |
| Mental disorders | 47 (1.00%) | 0.621 | 11 (0.23%, 23.4%) | 0.453 | 16 (0.34%) | 0.769 | 3 (0.06%, 18.8%) | 0.539 |
| Color blindness | 44 (1.10%) | 0.247 | 10 (0.25%, 22.7%) | 0.346 | 16 (0.40%) | 0.699 | 2 (0.05%, 12.5%) | 0.432 |
| Learning disorders | 29 (1.15%) | 0.239 | 6 (0.24%, 20.7%) | 0.547 | 14 (0.56%) | 0.106 | 7 (0.28%, 50.0%) | **<0.0001** |
| Height_99%tile | 31 (3.56%) | **<0.0001** | 4 (0.46%, 12.9%) | 0.063 | 2 (0.23%) | 0.383 | 0 (0.00%, 0.00%) | 0.524 |
| Allergic rhinitis | 37 (1.07%) | 0.392 | 0 (0.00%, 0.00%) | **0.001** | 7 (0.20%) | 0.106 | 2 (0.06%, 28.6%) | 0.526 |
| Knee disorders | 32 (0.77%) | 0.281 | 1 (0.02%, 3.12%) | **0.013** | 10 (0.24%) | 0.179 | 1 (0.02%, 10.0%) | 0.185 |
| Scoliosis (-1997) | 29 (1.73%) | **0.001** | 7 (0.42%, 24.1%) | **0.028** | 4 (0.24%) | 0.268 | 0 (0.00%, 0.00%) | 0.287 |
| Scoliosis/Kyphosis (1998-) | 25 (1.40%) | **0.038** | 1 (0.06%, 4.00%) | 0.150 | 12 (0.67%) | **0.031** | 7 (0.39%, 58.3%) | **<0.0001** |
| Asthma (moderate-severe) | 22 (1.06%) | 0.538 | 5 (0.24%, 22.7%) | 0.350 | 8 (0.38%) | 0.879 | 3 (0.14%, 37.5%) | 0.199 |
| ARF | 22 (15.7%) | **<0.0001** | 4 (2.86%, 18.2%) | **<0.0001** | 1 (0.71%) | 0.401 | 0 (0.00%, 0.00%) | 0.902 |
| Kyphosis (-1997) | 12 (1.32%) | 0.224 | 4 (0.44%, 33.3%) | 0.094 | 2 (0.22%) | 0.352 | 0 (0.00%, 0.00%) | 0.508 |
| Urogenital disorders | 12 (1.35%) | 0.191 | 3 (0.38%, 25.0%) | 0.233 | 3 (0.34%) | 0.592 | 1 (0.11%, 33.3%) | 0.483 |
| Endocrine disorders | 9 (1.48%) | 0.156 | 4 (0.66%, 44.4%) | **0.028** | 2 (0.33%) | 0.618 | 0 (0.00%, 0.00%) | 0.638 |
| Micro-hematuria | 8 (1.03%) | 0.771 | 5 (0.64%, 62.5%) | **0.016** | 1 (0.13%) | 0.224 | 0 (0.00%, 0.00%) | 0.562 |
| Hearing problems | 5 (0.50%) | 0.160 | 0 (0.00%, 0.00%) | 0.154 | 4 (0.40%) | 0.492 | 0 (0.00%, 0.00%) | 0.478 |
| Proteinuria | 4 (1.74%) | 0.201 | 0 (0.00%, 0.00%) | 0.649 | 0 (0.00%) | 0.431 | 0 (0.00%,----) | 0.844 |
| Diabetes Mellitus | 2 (2.35%) | 0.172 | 1 (1.18%, 50.0%) | 0.147 | 1 (1.18%) | 0.267 | 1 (1.18%, 100.%) | 0.061 |
| Hematological tumor | 3 (9.09%) | **0.004** | 0 (0.00%, 0.00%) | 0.940 | 1 (3.03%) | 0.114 | 0 (0.00%, 0.00%) | 0.976 |
| Malignant tumor | 2 (3.39%) | 0.105 | 0 (0.00%, 0.00%) | 0.895 | 0 (0.00%) | 0.806 | 0 (0.00%,---) | 0.957 |
| Hyperlipidemia | 2 (1.74%) | 0.290 | 0 (0.00%, 0.00%) | 0.806 | 0 (0.00%) | 0.657 | 0 (0.00%,---) | 0.918 |
| Migraine | 1 (0.30%) | 0.183 | 1 (0.30%, 100.%) | 0.465 | 0 (0.00%) | 0.295 | 0 (0.00%,---) | 0.782 |
| n – number of cases/records; statistically significant association are marked by bold p value (<0.05)  1 - % of all records within subcategory; 2 - % of All Valvar cases within subcategory; 3 - % of All non-Valvar cases within subcategory Significance code: all significant differences marked in bold, and level of significance is color coded: p<0.05; p<0.01; p<0.0001. | | | | | | | | |
